# Supplementary material
Source: HighWire-hosted journal article supplement (https://jcp.bmj.com/content/71/8/687)
Supplement: inline-supplementary-material-4 [file inline-supplementary-material-4.pdf]

| Gene, change   | Forward primer           | Reverse primer            |
|----------------|--------------------------|---------------------------|
| PRNP Val129Met | atggcgaaccttggtgctggatgc | gtggttggtgaccgtgctgcttgat |
| CST3 Ala25Thr  | caggagtggaggaggagatg     | ccagatgagggctctgttt       |
| FGA Thr331Ala  | gtctgggtgtaggcctcg       | aacagacatgccgcagatga      |

**Supplementary table 3:** List of primers used for validation by Sanger sequencing
